# Supplementary material for: Non-falciparum malaria infection and IgG seroprevalence among children under 15 years in Nigeria, 2018
Source: PubMed Central journal article supplement (PMC10011577; doi:10.1038/s41467-023-37010-0), 2023-03-13
Supplement: 41467_2023_37010_MOESM1_ESM.pdf [file 41467_2023_37010_MOESM1_ESM.pdf]

1 **Non-falciparum malaria infection and IgG seroprevalence among children under 15 years**  
 2 **in Nigeria, 2018**

3 **Supplementary Information**

4

5 **Supplementary Table 1.** Tabulation for distribution of active infections by age of children for  
 6 samples selected for PET-PCR assays.

7

| Age (years)  | Samples with Infecting <i>Plasmodium</i> species (n) |           |          |            |           |          |          | Age Total (n) |
|--------------|------------------------------------------------------|-----------|----------|------------|-----------|----------|----------|---------------|
|              | Pf                                                   | Pm        | Po       | Pf/Pm      | Pf/Po     | Pm/Po    | Pf/Pm/Po |               |
| <1           | 18                                                   | 0         | 0        | 1          | 0         | 0        | 1        | 20            |
| 1            | 33                                                   | 1         | 0        | 4          | 0         | 0        | 0        | 38            |
| 2            | 60                                                   | 1         | 1        | 8          | 1         | 0        | 0        | 71            |
| 3            | 76                                                   | 0         | 0        | 12         | 3         | 1        | 0        | 92            |
| 4            | 79                                                   | 1         | 0        | 18         | 1         | 0        | 1        | 100           |
| 5            | 79                                                   | 2         | 1        | 13         | 8         | 0        | 0        | 103           |
| 6            | 81                                                   | 0         | 1        | 13         | 0         | 1        | 1        | 97            |
| 7            | 66                                                   | 2         | 0        | 12         | 5         | 0        | 0        | 85            |
| 8            | 72                                                   | 1         | 0        | 21         | 5         | 0        | 0        | 99            |
| 9            | 50                                                   | 0         | 0        | 7          | 1         | 0        | 2        | 60            |
| 10           | 63                                                   | 0         | 1        | 16         | 1         | 0        | 0        | 81            |
| 11           | 30                                                   | 1         | 0        | 7          | 3         | 0        | 0        | 41            |
| 12           | 50                                                   | 2         | 0        | 6          | 0         | 0        | 0        | 58            |
| 13           | 39                                                   | 0         | 0        | 5          | 1         | 0        | 1        | 46            |
| 14           | 32                                                   | 2         | 0        | 6          | 1         | 0        | 0        | 41            |
| <b>Total</b> | <b>828</b>                                           | <b>13</b> | <b>4</b> | <b>149</b> | <b>30</b> | <b>2</b> | <b>6</b> | <b>1032</b>   |

8

9

10

11

12

13

14

15 **Supplementary Table 2.** Among children with any *Plasmodium* infection, multivariate adjusted  
 16 analysis for risk of PET-PCR confirmed *P. malariae* and *P. ovale* mixed or mono-infection  
 17 compared to *P. falciparum* mono-infections alone.

18

| Variable                                                  | <i>P. malariae</i> <sup>b</sup><br>aOR (95% CI) | <i>P. ovale</i> <sup>b</sup><br>aOR (95% CI) |
|-----------------------------------------------------------|-------------------------------------------------|----------------------------------------------|
| <b>Sex</b>                                                |                                                 |                                              |
| Female                                                    | ref                                             | ref                                          |
| Male                                                      | 0.85 (0.61, 1.19)                               | 0.75 (0.39, 1.41)                            |
| <b>Age in years</b>                                       |                                                 |                                              |
| <5                                                        | ref                                             | ref                                          |
| 5–9                                                       | 1.24 (0.83, 1.87)                               | 2.24 (1.07, 5.41)*                           |
| 10–14                                                     | 1.29 (0.83, 2.03)                               | 1.28 (0.46, 3.45)                            |
| <b>Wealth</b>                                             |                                                 |                                              |
| Lowest                                                    | ref                                             | ref                                          |
| Second                                                    | 1.17 (0.76, 1.80)                               | 0.60 (0.25, 1.28)                            |
| Middle                                                    | 0.59 (0.35, 0.96)*                              | 0.37 (0.13, 0.86)*                           |
| Fourth                                                    | 0.68 (0.38, 1.16)                               | 0.41 (0.13, 1.05)                            |
| Highest                                                   | 0.50 (0.20, 1.06)                               | 0.07 (0.00, 0.52)*                           |
| <b>Place of residence</b>                                 |                                                 |                                              |
| Rural                                                     | ref                                             | ref                                          |
| Urban                                                     | 1.20 (0.79, 1.81)                               | 1.38 (0.61, 2.88)                            |
| <b>Mosquito net coverage<sup>a</sup><br/>(individual)</b> |                                                 |                                              |
|                                                           | 1.20 (0.62, 2.23)                               | 1.07 (0.33, 3.01)                            |
| <b>Mosquito net coverage<sup>a</sup><br/>(community)</b>  |                                                 |                                              |
|                                                           | 0.57 (0.23, 1.24)                               | 1.56 (0.35, 5.06)                            |

19 \*Statistically significant at alpha= 0.05

20 <sup>a</sup>Net coverage is defined as at least 1 net per 1.8 household members.

21 <sup>b</sup>Inclusive of *P. malariae* and *P. ovale* single-species infections, or mixed with *P. falciparum*

22

23

24

25

26

27

28

29

30

31 **Supplementary Table 3.** Seropositivity to PmMSP1, PoMSP1, and PvMSP1 among children  
 32 age <15 years in Nigeria by state, 2018.

33

|                           | Children<br>(n) | <i>P. malariae</i> MSP1<br>% (95% CI) | <i>P. ovale</i> MSP1,<br>% (95% CI) | <i>P. vivax</i> MSP1,<br>% (95% CI) |
|---------------------------|-----------------|---------------------------------------|-------------------------------------|-------------------------------------|
| <b>Total</b>              | 31,234          | 34.2 (33.3- 35.2)                     | 12.1 (11.6- 12.5)                   | 6.3 (6.0- 6.7)                      |
| <b>North Central Zone</b> |                 |                                       |                                     |                                     |
| Benue                     | 932             | 31.3 (26.9, 35.7)                     | 9.8 (7.3, 12.3)                     | 4.7 (3.0, 6.5)                      |
| FCT*                      | 234             | 19.7 (13.2, 26.3)                     | 10.4 (5.9, 14.9)                    | 4.6 (2.0, 7.2)                      |
| Kogi                      | 504             | 31.3 (25.4, 37.1)                     | 17.1 (12.2, 22.0)                   | 10.5 (6.8, 14.1)                    |
| Kwara                     | 424             | 28.3 (21.7, 34.8)                     | 12.1 (8.4, 15.8)                    | 9.6 (6.3, 13.0)                     |
| Nasarawa                  | 425             | 36.7 (30.5, 43.0)                     | 13.0 (9.1, 17.0)                    | 6.2 (3.6, 8.8)                      |
| Niger                     | 1290            | 32.0 (27.5, 36.5)                     | 11.5 (9.3, 13.7)                    | 6.3 (4.7, 7.9)                      |
| Plateau                   | 775             | 32.1 (25.6, 38.6)                     | 11.7 (9.0, 14.4)                    | 6.6 (4.9, 8.4)                      |
| <b>North East Zone</b>    |                 |                                       |                                     |                                     |
| Adamawa                   | 855             | 41.3 (34.6, 47.9)                     | 13.8 (9.6, 17.9)                    | 6.2 (4.4, 8.1)                      |
| Bauchi                    | 1420            | 41.7 (37.1, 46.3)                     | 12.0 (10.0, 14.1)                   | 8.0 (6.1, 9.8)                      |
| Borno                     | 636             | 24.2 (14.3, 34.1)                     | 6.4 (3.4, 9.3)                      | 4.6 (2.8, 6.3)                      |
| Gombe                     | 822             | 39.1 (33.8, 44.3)                     | 9.9 (7.4, 12.5)                     | 6.0 (4.2, 7.7)                      |
| Taraba                    | 687             | 42.3 (36.7, 47.9)                     | 14.5 (11.4, 17.5)                   | 7.7 (5.2, 10.2)                     |
| Yobe                      | 576             | 29.3 (22.3, 36.2)                     | 9.0 (6.0, 12.0)                     | 4.9 (2.8, 7.0)                      |
| <b>North West Zone</b>    |                 |                                       |                                     |                                     |
| Jigawa                    | 1374            | 39.5 (35.0, 44.1)                     | 8.6 (6.8, 10.4)                     | 6.2 (4.4, 8.0)                      |
| Kaduna                    | 1816            | 40.5 (35.4, 45.7)                     | 10.7 (8.9, 12.4)                    | 6.8 (5.5, 8.1)                      |
| Kano                      | 1828            | 29.4 (24.8, 33.9)                     | 9.4 (7.7, 11.1)                     | 4.1 (3.1, 5.1)                      |
| Katsina                   | 1609            | 50.0 (44.3, 55.8)                     | 14.5 (12.1, 16.9)                   | 9.3 (7.5, 11.1)                     |
| Kebbi                     | 862             | 46.8 (41.2, 52.4)                     | 19.0 (15.2, 22.7)                   | 17.6 (13.7, 21.4)                   |
| Sokoto                    | 848             | 38.4 (33.8, 42.9)                     | 15.8 (12.1, 19.5)                   | 12.5 (9.6, 15.5)                    |
| Zamfara                   | 371             | 27.6 (21.8, 33.4)                     | 14.1 (9.8, 18.4)                    | 9.2 (5.4, 13.0)                     |
| <b>South East Zone</b>    |                 |                                       |                                     |                                     |
| Abia                      | 645             | 27.0 (21.5, 32.5)                     | 10.8 (8.2, 13.4)                    | 3.0 (1.6, 4.5)                      |
| Anambra                   | 881             | 16.0 (12.4, 19.5)                     | 6.4 (4.8, 8.1)                      | 1.7 (0.9, 2.5)                      |
| Ebonyi                    | 691             | 57.6 (53.2, 62.1)                     | 18.5 (15.1, 22.0)                   | 7.5 (5.1, 9.9)                      |
| Enugu                     | 678             | 32.2 (26.8, 37.5)                     | 10.1 (7.3, 12.9)                    | 3.0 (1.7, 4.2)                      |
| Imo                       | 1089            | 28.1 (23.5, 32.8)                     | 14.2 (11.5, 17.0)                   | 2.5 (1.5, 3.5)                      |
| <b>South South Zone</b>   |                 |                                       |                                     |                                     |
| Akwa Ibom                 | 793             | 53.2 (47.9, 58.5)                     | 22.3 (18.5, 26.0)                   | 7.6 (5.5, 9.8)                      |
| Bayelsa                   | 468             | 38.2 (31.3, 45.0)                     | 14.4 (10.4, 18.4)                   | 5.8 (3.6, 7.9)                      |
| Cross River               | 601             | 39.1 (33.8, 44.4)                     | 11.5 (8.7, 14.3)                    | 5.5 (3.6, 7.5)                      |
| Delta                     | 911             | 31.2 (25.4, 37.1)                     | 13.6 (10.4, 16.8)                   | 6.3 (4.5, 8.2)                      |
| Edo                       | 657             | 29.2 (24.0, 34.4)                     | 13.1 (9.6, 16.7)                    | 5.0 (3.3, 6.8)                      |
| Rivers                    | 935             | 29.2 (23.7, 34.7)                     | 14.3 (11.2, 17.3)                   | 5.0 (3.2, 6.9)                      |

South West Zone

|       |      |                   |                   |                 |
|-------|------|-------------------|-------------------|-----------------|
| Ekiti | 325  | 40.8 (33.3, 48.2) | 17.9 (13.3, 22.5) | 6.5 (3.7, 9.3)  |
| Lagos | 1671 | 5.2 (3.9, 6.5)    | 2.9 (2.1, 3.7)    | 1.7 (1.0, 2.4)  |
| Ogun  | 601  | 20.5 (16.1, 24.9) | 6.9 (4.3, 9.4)    | 3.6 (2.1, 5.2)  |
| Ondo  | 540  | 41.1 (34.9, 47.2) | 18.5 (15.4, 21.5) | 9.5 (6.6, 12.5) |
| Osun  | 442  | 41.0 (33.7, 48.3) | 12.8 (9.5, 16.1)  | 7.0 (4.3, 9.8)  |
| Oyo   | 1018 | 35.7 (30.9, 40.6) | 15.2 (12.8, 17.6) | 7.3 (5.4, 9.3)  |

---

\* Federal Capital Territory

34

35

36

37 **Supplementary Table 4.** Bivariate association models assessing socioeconomic risk factors for  
 38 seropositivity to PmMSP1, PoMSP1, and PvMSP1.

39

| <b>Risk factor</b>                        | <b>Pm MSP1<br/>OR (95% CI)</b> | <b>PoMSP1<br/>OR (95% CI)</b> | <b>PvMSP1<br/>OR (95% CI)</b> |
|-------------------------------------------|--------------------------------|-------------------------------|-------------------------------|
| <b>Total household members</b>            | 1.02 (1.01, 1.03)*             | 1.02 (1.01, 1.03)*            | 1.02 (1.01, 1.03)*            |
| <b>Own any livestock</b>                  | 1.47 (1.37, 1.57)*             | 1.33 (1.23, 1.45)*            | 1.50 (1.34, 1.67)*            |
| <b>Main roof material</b>                 |                                |                               |                               |
| Natural roof (no roof, mud, or hatch)     | ref                            | ref                           | ref                           |
| Finished roofing                          | 0.63 (0.57, 0.69)*             | 0.86 (0.76, 0.96)*            | 0.66 (0.58, 0.76)*            |
| Rudimentary roofing                       | 0.69 (0.54, 0.87)*             | 0.77 (0.58, 1.03)             | 0.80 (0.56, 1.14)             |
| Other                                     | 0.58 (0.49, 0.70)*             | 0.93 (0.76, 1.14)             | 0.76 (0.58, 0.99)*            |
| <b>Main wall material</b>                 |                                |                               |                               |
| Natural wall (no walls, dirt, cane/ palm) | ref                            | ref                           | ref                           |
| Finished walls                            | 0.66 (0.56, 0.77)*             | 0.83 (0.68, 1.00)*            | 0.72 (0.56, 0.92)*            |
| Rudimentary walls                         | 1.27 (1.08, 1.49)*             | 1.13 (0.93, 1.37)             | 1.26 (0.99, 1.61)             |
| Other                                     | 0.78 (0.55, 1.09)              | 0.97 (0.65, 1.44)             | 0.65 (0.37, 1.14)             |
| <b>Air conditioner present</b>            | 0.47 (0.39, 0.58)*             | 0.47 (0.35, 0.63)*            | 0.39 (0.25, 0.60)*            |
| <b>Electricity</b>                        | 0.45 (0.41, 0.48)*             | 0.64 (0.59, 0.70)*            | 0.52 (0.46, 0.58)*            |
| <b>Location of water source</b>           |                                |                               |                               |
| Elsewhere                                 | ref                            | ref                           | ref                           |
| In own dwelling                           | 0.89 (0.79, 1.01)              | 0.91 (0.78, 1.05)             | 1.25 (1.04, 1.49)*            |
| In own yard                               | 1.01 (0.92, 1.12)              | 0.98 (0.87, 1.11)             | 1.06 (0.91, 1.24)             |

40 \*significant at alpha= 0.05

41

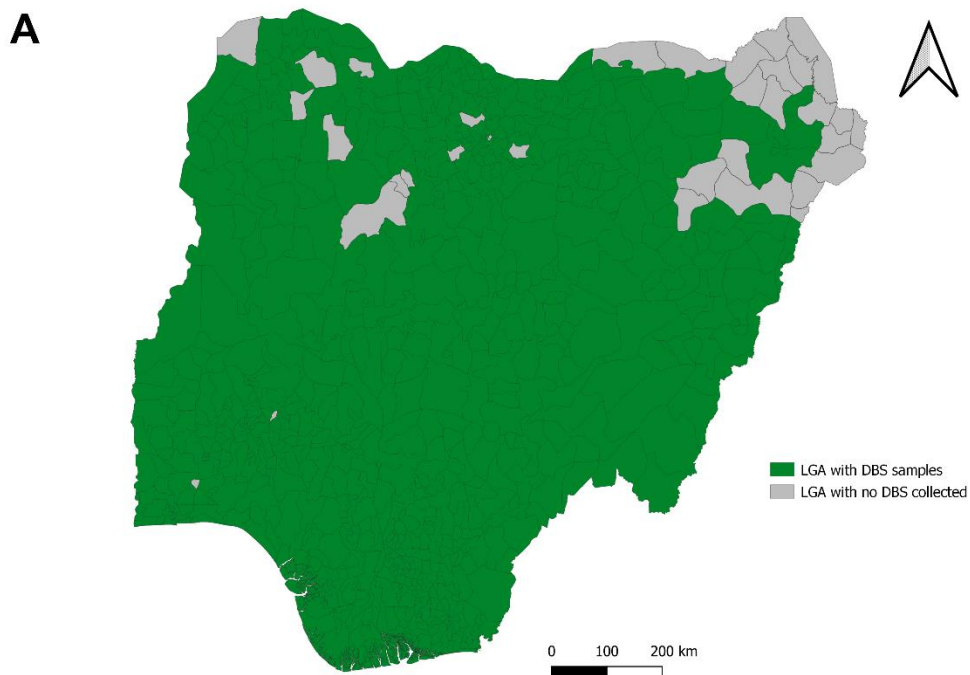

**B**

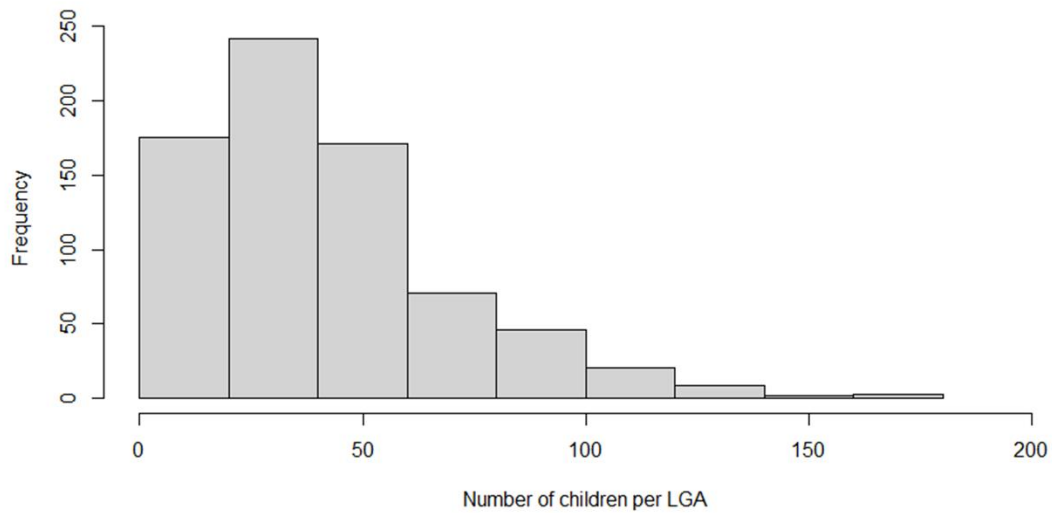

42

43 **Supplementary Figure 1.** (A) Map of Nigeria showing local government area (LGA)

44 administrative units for which DBS from children age <15 years were collected and subsequent

45 malaria data acquired. (B) Histogram of number of children <15y of age with DBS by LGA.

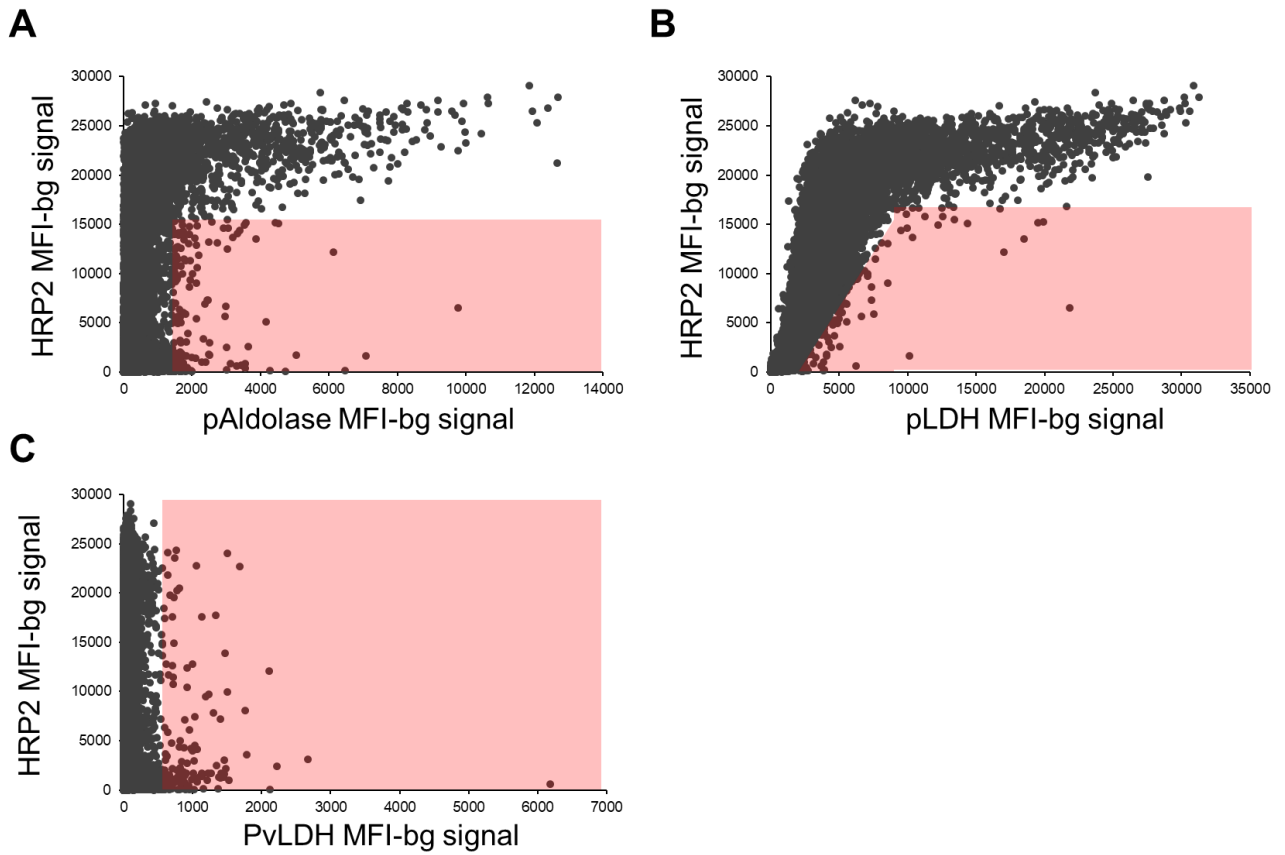

47

48

49 **Supplementary Figure 2.** Scatterplots of HRP2 assay signal in comparison to pan-*Plasmodium*

50 aldolase (A), pan-*Plasmodium* LDH (B), and *P. vivax* LDH (C). Shaded area indicates DBS

51 samples that were selected by low/absent HRP2 levels (A,B) or positivity to PvLDH (C) for later

52 DNA assays.

53

54

55

56

57

58

**A**

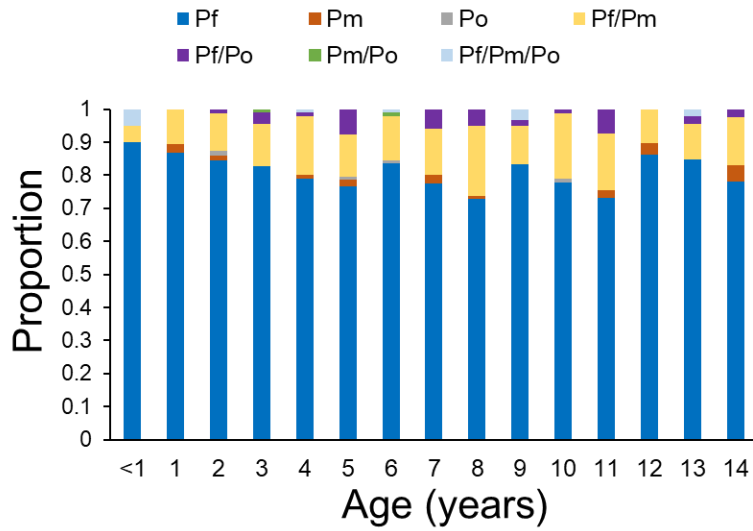

**B**

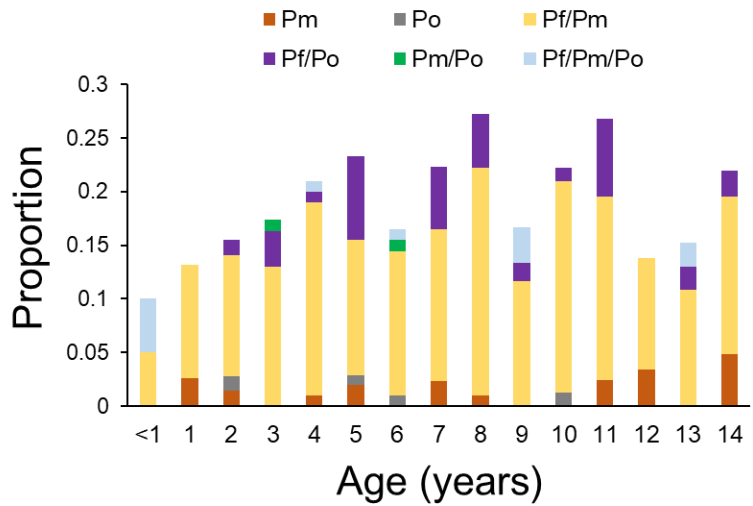

59

60

61 **Supplementary Figure 3. Percentages of the species of *Plasmodium* infection by age in**

62 **Nigerian children ages 0-14. (A) Proportions of infections from selected samples containing**

63 **different *Plasmodium* species for all specimens and inclusive of *P. falciparum* mono-infections,**

64 **and with *P. falciparum* mono-infections removed (B).**

65



66

67

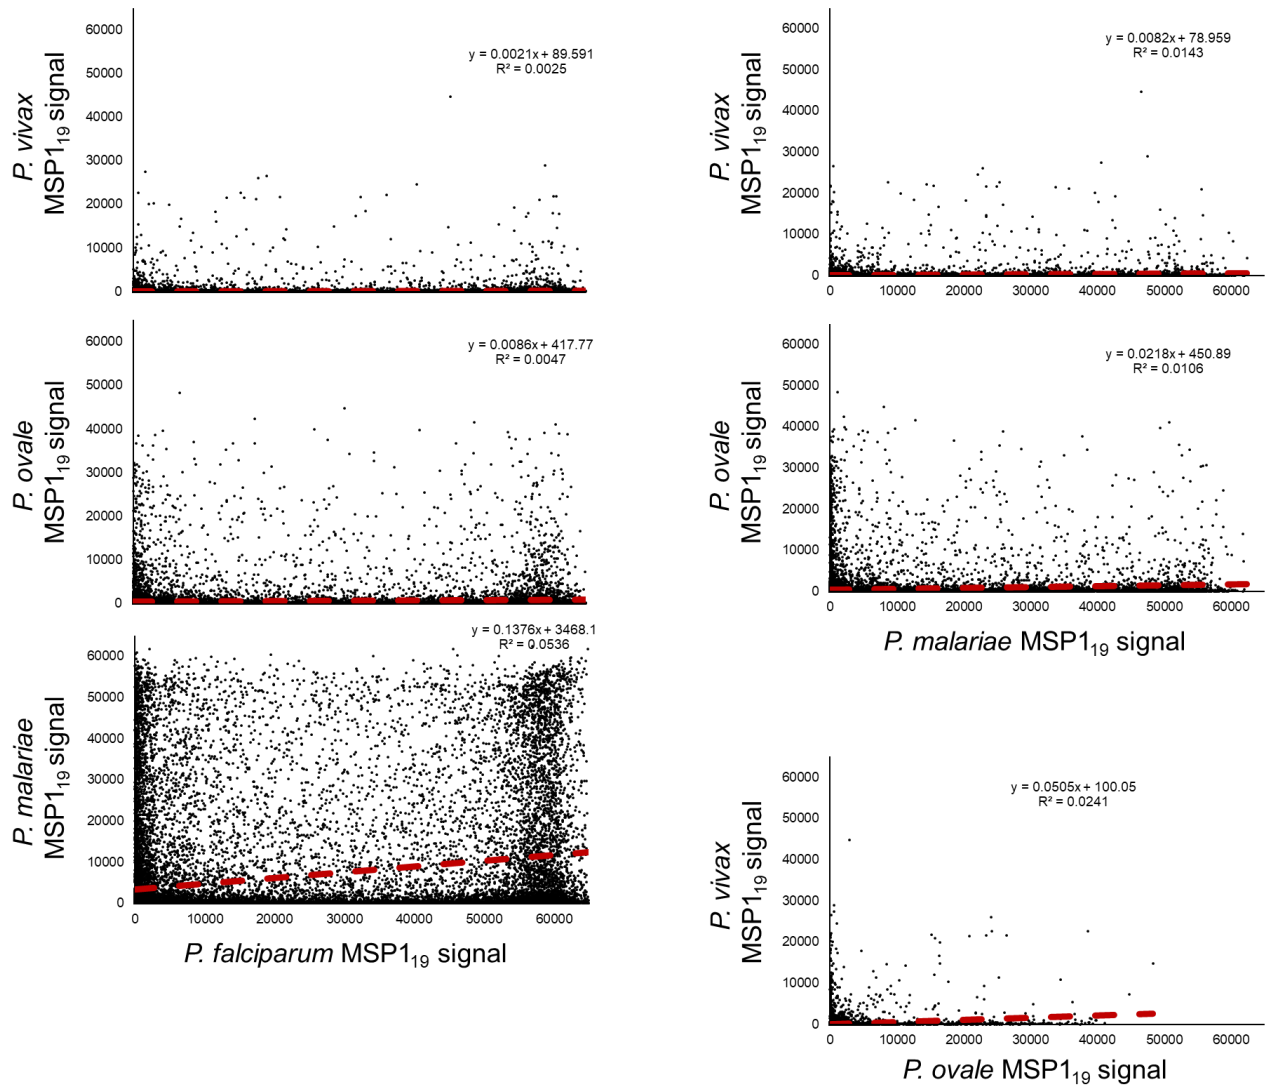

68

69

70 **Supplementary Figure 4.** Scatterplots of IgG assay signal with each species' MSP1-19kD

71 antigen compared to all others. Red hashed line shows linear regression fitting, with inset text

72 displaying model estimates.

73

74

75

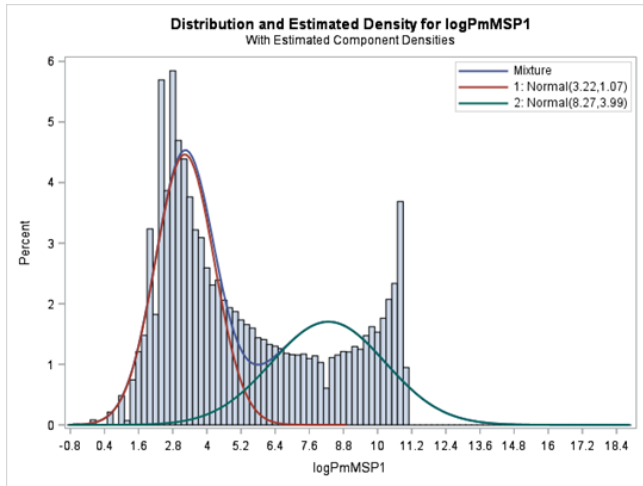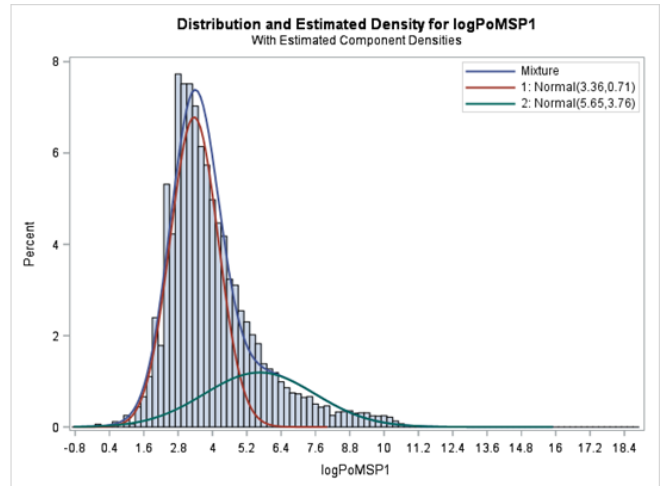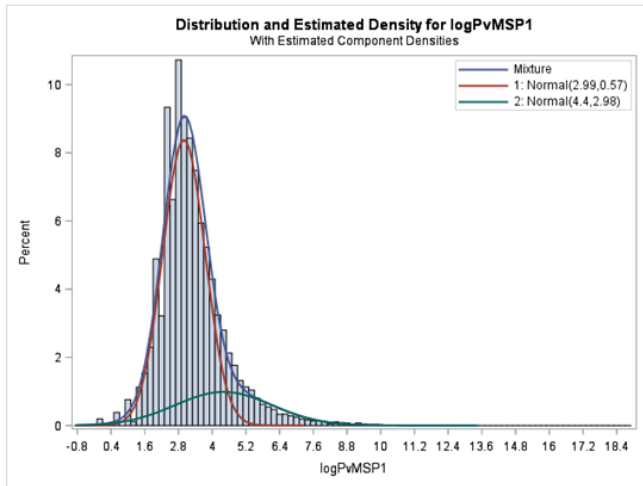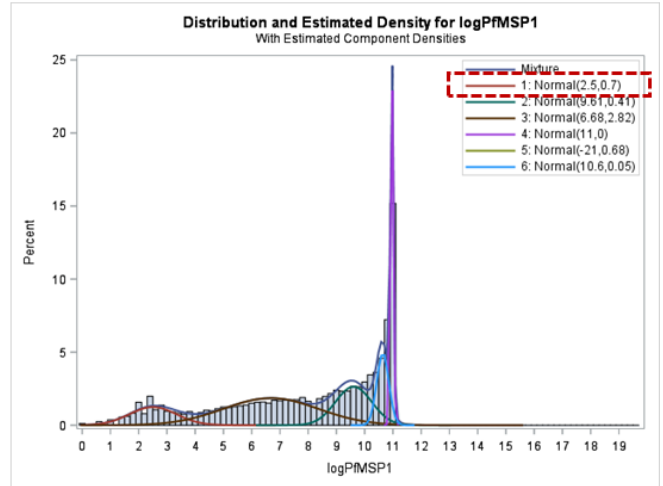

76

77

78 **Supplementary Figure 5.** Finite mixture models (FMM) of log-transformed assay signals for  
 79 PmMSP1, PoMSP1, PvMSP1, and PfMSP1. For the two-component fittings (PmMSP1,  
 80 PoMSP1, PvMSP1), the red density curve represents the putative seronegative population with  
 81 estimates for distribution mean and variance in inset boxes. The PfMSP1 data needed to be fit  
 82 to a six-component FMM in order to confidently ascertain the seronegative component – in red  
 83 with parameter outputs in red hashed box.

84

85

86

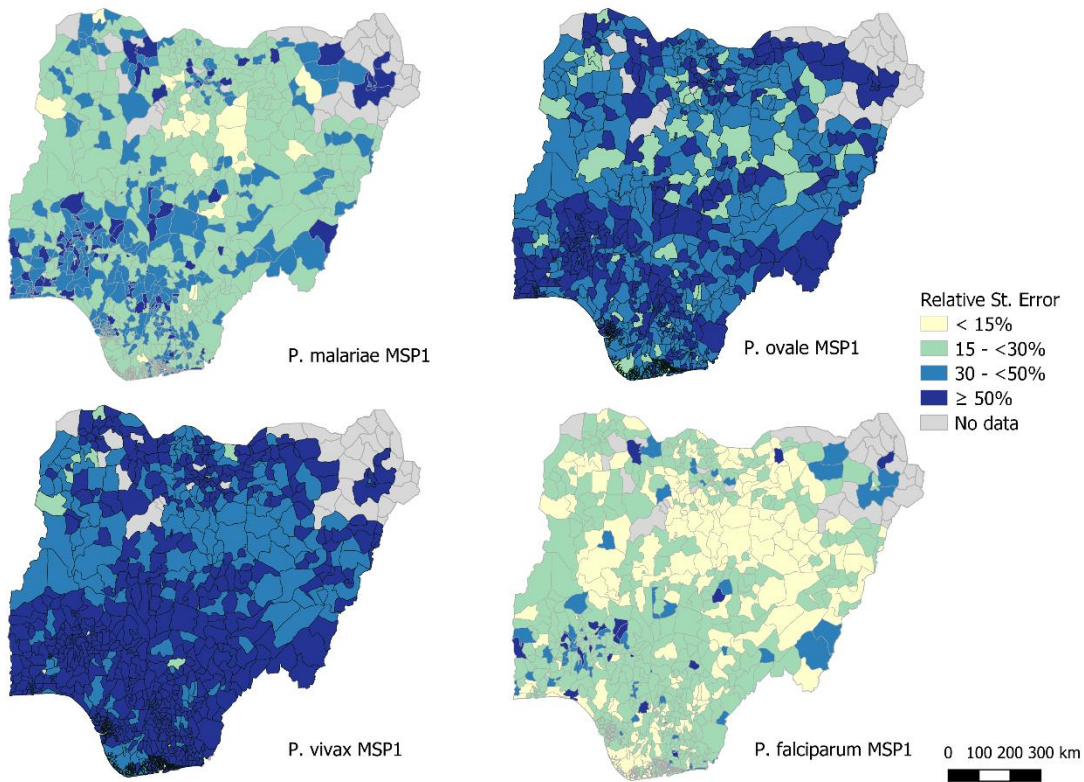

87

88

89 **Supplemental Figure 6.** Relative standard errors for seroprevalence estimates to MSP1

90 antigens by LGA.

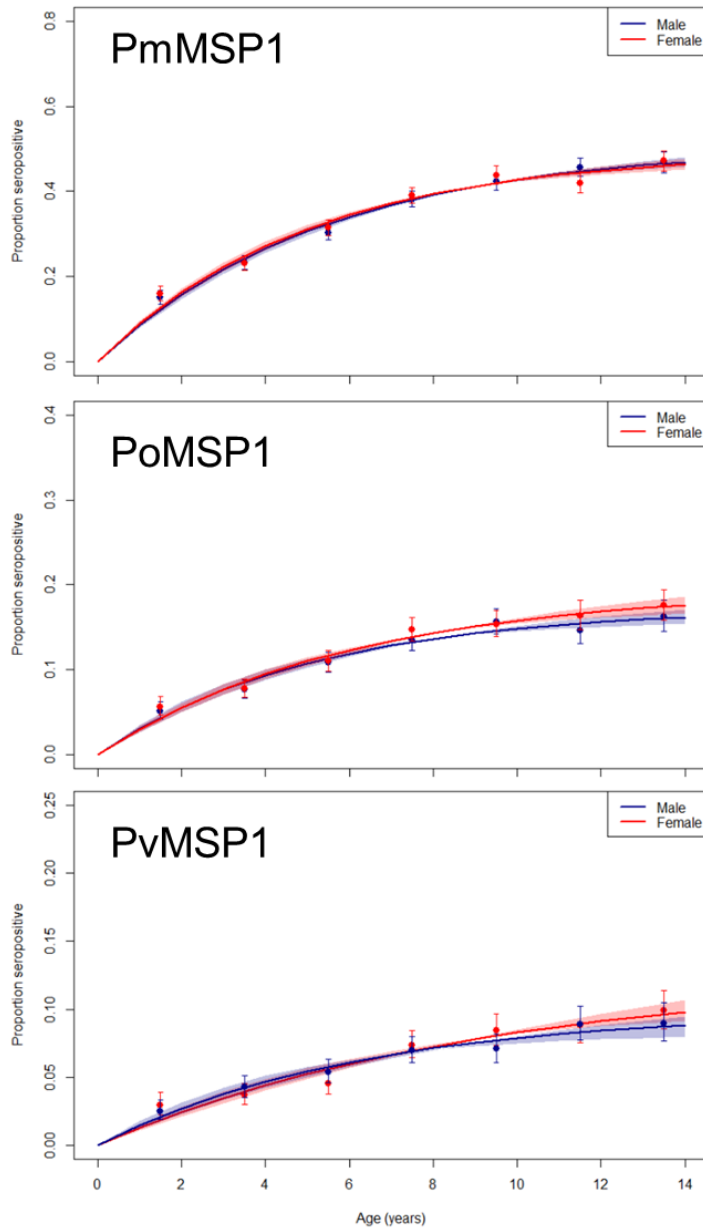

91

92 **Supplementary Figure 7.** Seroprevalence by age and sex for antibodies to *P. malariae*, *P.*  
 93 *ovale*, and *P. vivax* MSP1 antigens. Dots represent the proportion seropositive and error bars  
 94 represent the 95% confidence intervals for seropositivity for each age group.. Curves represent  
 95 the fit of the catalytic conversion model, and the shading indicates the 95% credible interval of  
 96 the model fit. For all plots, n=31,234 biologically independent samples.

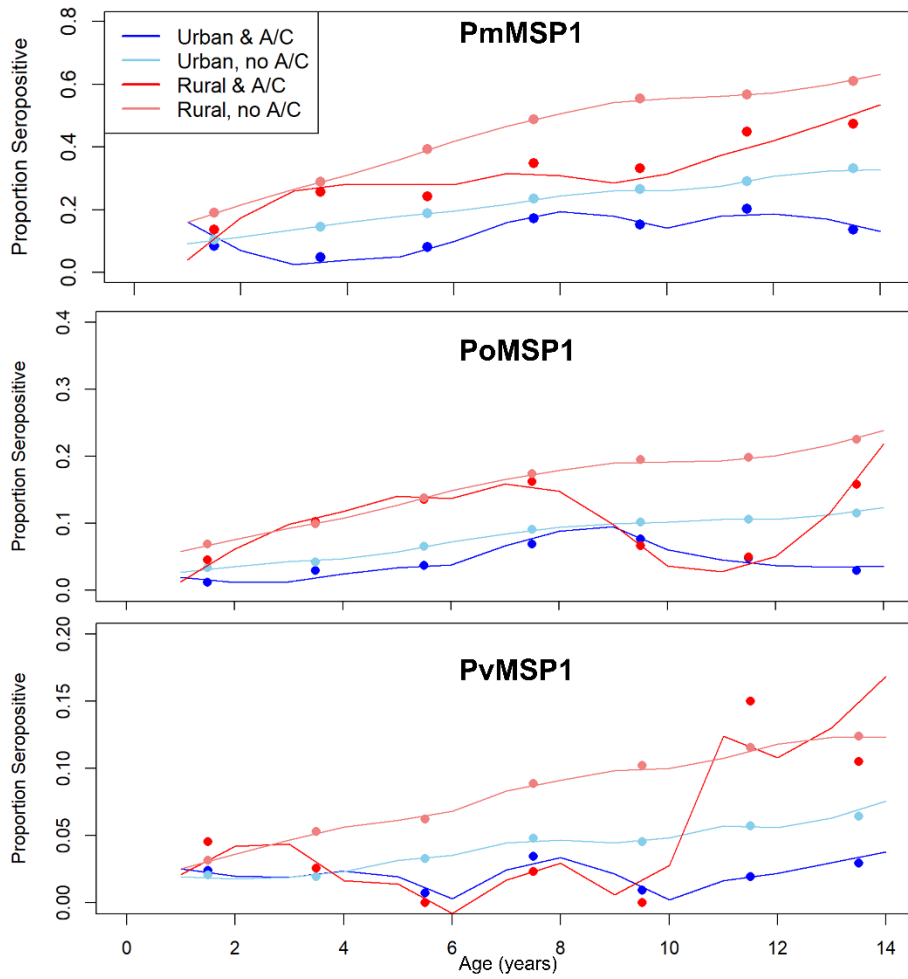

98

99

100 **Supplementary Figure 8.** Seroprevalence by age, urbanicity and presence of air conditioning

101 (A/C) in the household for antibodies to *P. malariae*, *P. ovale*, and *P. vivax* MSP1 antigens.

102 Points represent estimates for seroprevalence for each age category. Curves represent the fit of

103 the LOESS regression.

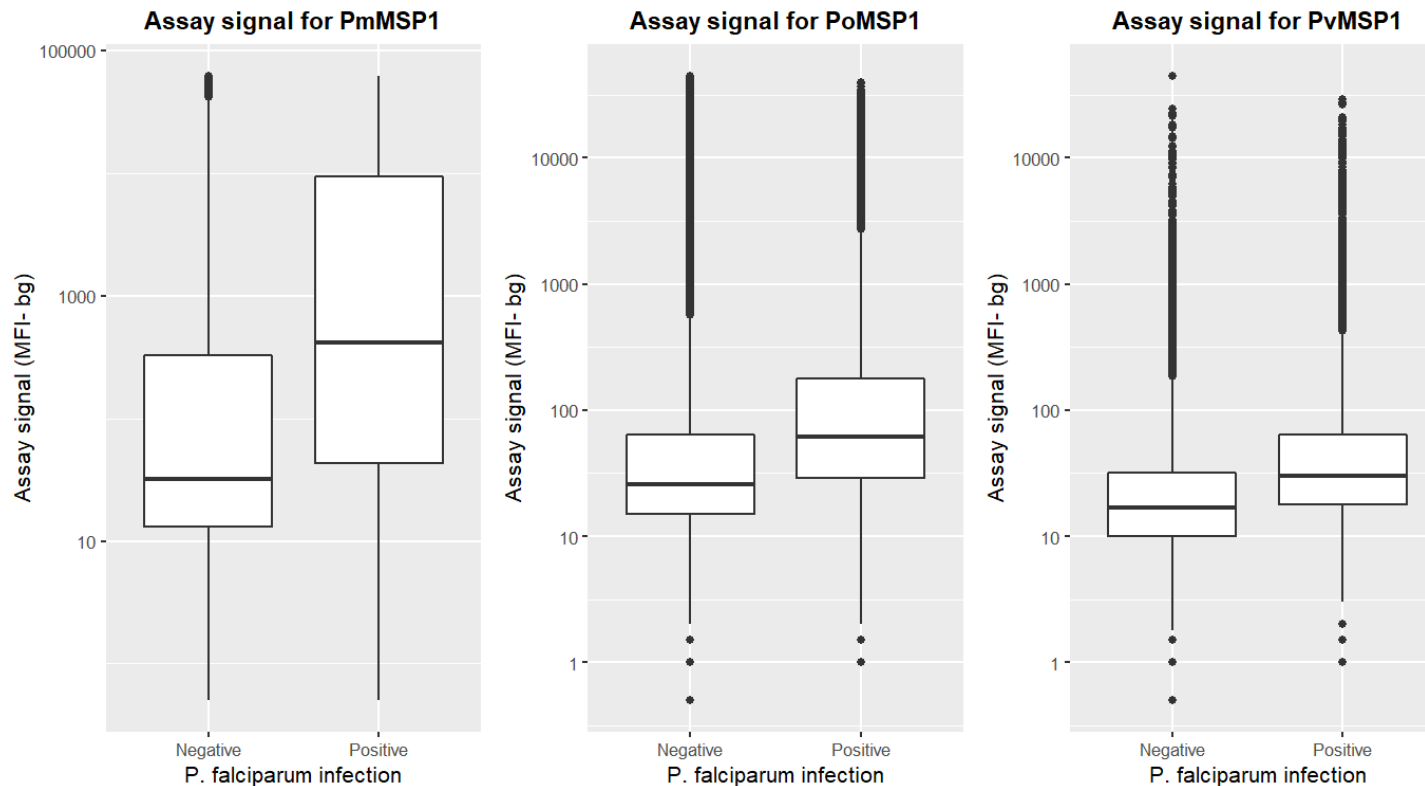

104

105

106 **Supplementary Figure 9.** Comparing the IgG assay signal for *P. malariae*, *P. ovale*, and *P. vivax* MSP1<sub>19</sub> targets by active *P.*

107 *falciparum* infection. Boxes display interquartile range (IQR), with horizontal lines as median assay signals and whiskers extending

108 1.5x IQR above and below boxes and points at greater than 1.5x IQR. Each plot represents data from a total of 1,204 biologically

109 independent samples that underwent PET-PCR analysis.

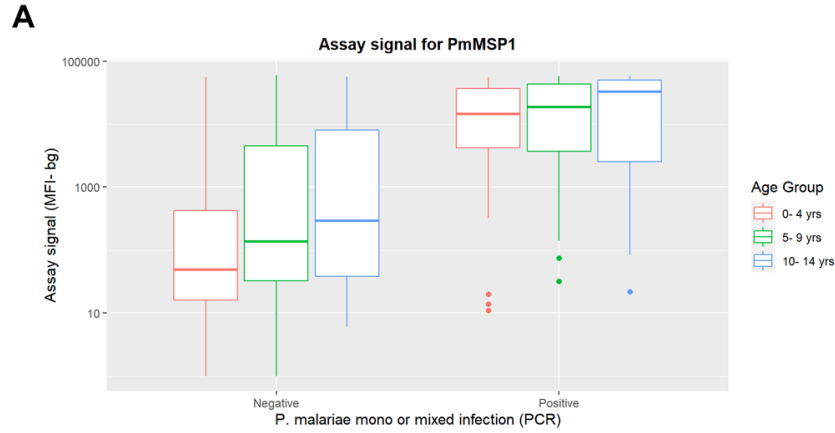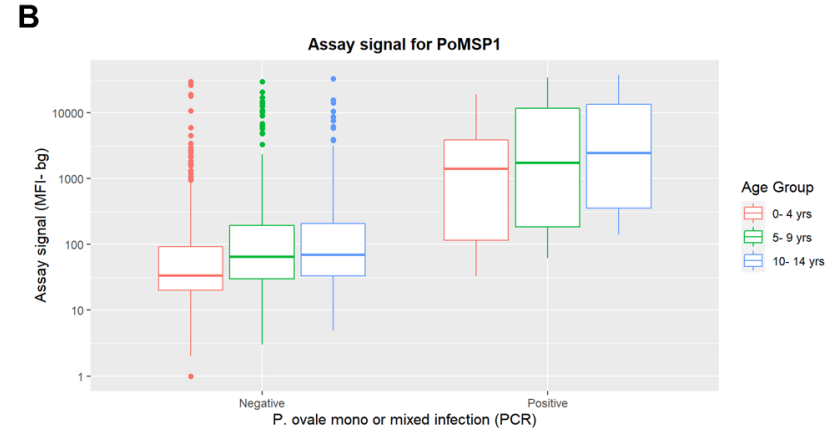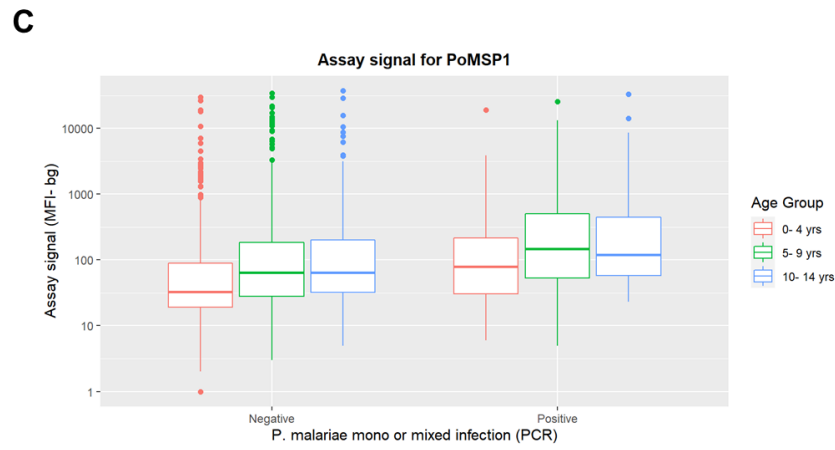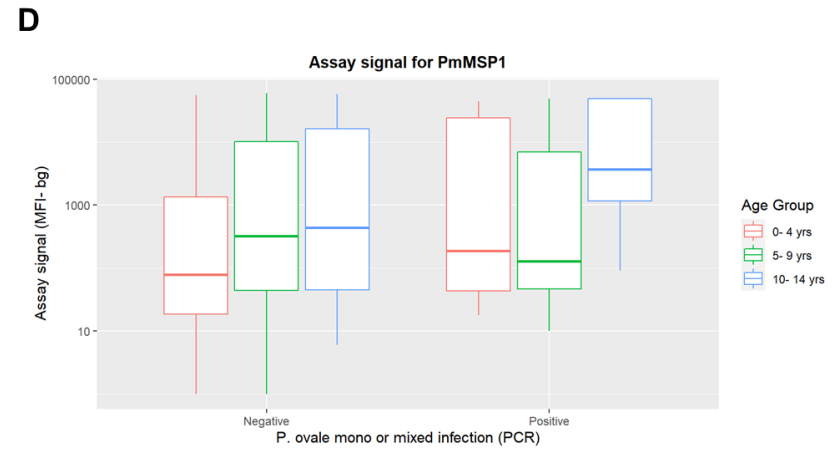

110 **Supplementary Figure 10.** Comparing MSP1 antigen assay signals by active malaria infection (PET-PCR positive for *P. ovale* and  
 111 *P. malariae*) categorized by age. (A) PmMSP1 assay signal for children by *P. malariae* infection status. (B) PoMSP1 assay signal for  
 112 children by *P. ovale* infection status. (C) PoMSP1 assay signal for children by *P. malariae* active infection status. (D) PmMSP1 assay  
 113 signal for children by *P. ovale* active infection status. Boxes display interquartile range (IQR), with horizontal lines as median assay

114 signals and whiskers extending 1.5x IQR above and below boxes and points at greater than 1.5x IQR. Each plot represents data  
115 from a total of 1,204 biologically independent samples that underwent PET-PCR analysis.
