# Supplementary material for: Non-falciparum malaria infection and IgG seroprevalence among children under 15 years in Nigeria, 2018
Source: PubMed Central journal article supplement (PMC10011577; doi:10.1038/s41467-023-37010-0), 2023-03-13
Supplement: 41467_2023_37010_MOESM3_ESM.pdf [file 41467_2023_37010_MOESM3_ESM.pdf]

## **Description of Additional Supplementary Files**

File Name: Supplementary Data 1

Description: PET-PCR primers used in this study
